# Supplementary material for: Preclinical characterization of ISB 1342, a CD38 × CD3 T-cell engager for relapsed/refractory multiple myeloma
Source: PubMed Central journal article supplement — Blood. 2023 May 19;142(3):260–73. doi: 10.1182/blood.2022019451 (PMC10644056; doi:10.1182/blood.2022019451), 2023-05-19
Supplement: BLOOD_BLD-2022-019451-mmc1.pdf [file BLOOD_BLD-2022-019451-mmc1.pdf]

1 **Supplementary Figures and Methods:**

2 **Pre-clinical characterization of ISB 1342, a CD38xCD3 T-cell engager for**  
3 **relapsed/refractory multiple myeloma**

4 B. Pouleau<sup>1#</sup>, C. Estoppey<sup>2#</sup>, P. Suere<sup>1</sup>, E. Nallet<sup>1</sup> A. Laurendon<sup>2</sup>, T. Monney<sup>2</sup>, D. Pais<sup>1</sup>, A.  
5 Drake<sup>1</sup>, L. Carretero-Iglesia<sup>1</sup>, J. Macoin<sup>1</sup>, J. Berret<sup>1</sup>, M. Pihlgren<sup>1</sup>, M. A. Doucey<sup>1</sup>, G. Gudi<sup>3</sup>, V.  
6 Menon<sup>3</sup>, V. Udupa<sup>4</sup>, A. Maiti<sup>5</sup>, G. Borthakur<sup>5</sup>, A. Srivastava<sup>2</sup>, S. Blein<sup>2</sup>, M. L. Mbow<sup>1</sup>, T.  
7 Matthes<sup>6</sup>, Z. Kaya<sup>7</sup>, C. M. Edwards<sup>7</sup>, J. R. Edwards<sup>7</sup>, E. Menoret<sup>8</sup>, C. Kervoelen<sup>8</sup>, C. Pellat-  
8 Deceunynck<sup>8,9</sup>, P. Moreau<sup>8,9,10</sup>, E. Zhukovsky<sup>1</sup>, M. Perro<sup>1\*</sup>, M. Chimen<sup>1\*</sup>.

9

10

11 **Supplementary Figures**

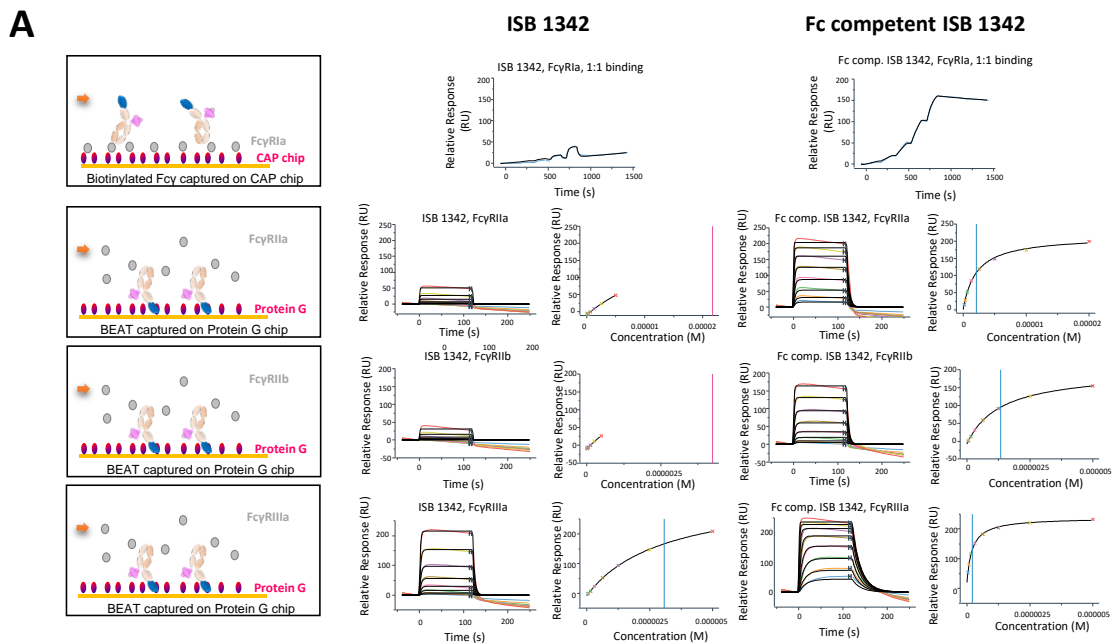

**B**

| Molecule                                                  | $K_D$ to FcγR1a (nM) | $K_D$ to FcγR1a ( $\mu$ M) | $K_D$ to FcγR1b ( $\mu$ M) | $K_D$ to FcγR1a3 ( $\mu$ M) |
|-----------------------------------------------------------|----------------------|----------------------------|----------------------------|-----------------------------|
| ISB 1342                                                  | 1330 $\pm$ 900       | Weak binding               | Weak binding               | 2.56 $\pm$ 0.46             |
| Fc competent ISB 1342                                     | 2.11 $\pm$ 0.11      | 0.59 $\pm$ 0.07            | 1.29 $\pm$ 0.06            | 0.2 $\pm$ 0.02              |
| Fold reduction for ISB 1342 over Fc competent counterpart | 630                  | ND                         | ND                         | 13                          |

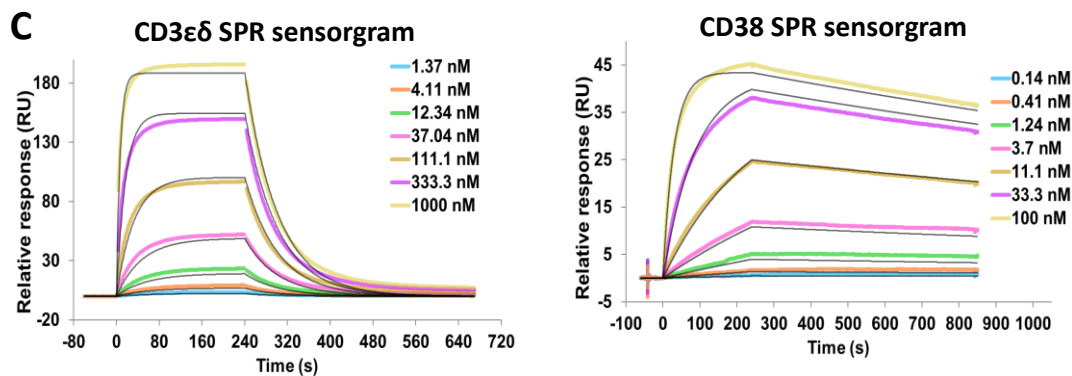

12 **Supplementary Figure 1. Additional characterization of ISB 1342 biophysical properties.**  
 13 (A) Binding to the FcγR is silenced in ISB 1342. The binding of ISB 1342 to Fcγ receptors 1a,  
 14 1a, 1b and 1a3 was measured by SPR and compared to a structurally identical version of  
 15 ISB 1342 that did not include the LALA mutations (Fc competent ISB 1342). For each receptor  
 16 and molecule tested, the fitted sensorgrams of a representative measurement are shown.  
 17 Data are expressed as number of resonance units (abbreviated RU; y axis) vs. time (seconds;  
 18 x axis). Colored lines represent experimental data and black lines represent the fitted data  
 19 using the 1:1 kinetics model. For FcγR1a, 1b and 1a3, the data were fit using a steady state  
 20 affinity model. For FcγR1a, 1a and 1b, the binding to Fc receptors was too weak to infer a  $K_D$   
 21

22 value, while the  $K_D$  to FcγRIIIa was decreased by a factor 13, as summarized in the table in  
23 B. (B) Summary table of dissociation constants ( $K_D$ ). Data are reported as the average of at  
24 least 4 independent measurements  $\pm$  standard deviation. (C) Fitted sensorgrams of  
25 independent measurements show the binding of ISB 1342 to human CD3εδ (left panel) and  
26 human CD38 (right panel) by SPR. Data are expressed as number of resonance units  
27 (abbreviated RU; y axis) vs. time (seconds; x axis). Curves represent single concentration  
28 injections from 0.1 μM for CD38 binding and 1 μM for CD3εδ binding with serial dilutions of  
29 1/3. Colored lines represent experimental data and black lines represent the fitted data using  
30 the 1:1 kinetics model.

31  
32  
33  
34  
35  
36  
37  
38  
39  
40  
41  
42  
43  
44  
45  
46  
47  
48  
49  
50  
51  
52  
53  
54  
55  
56

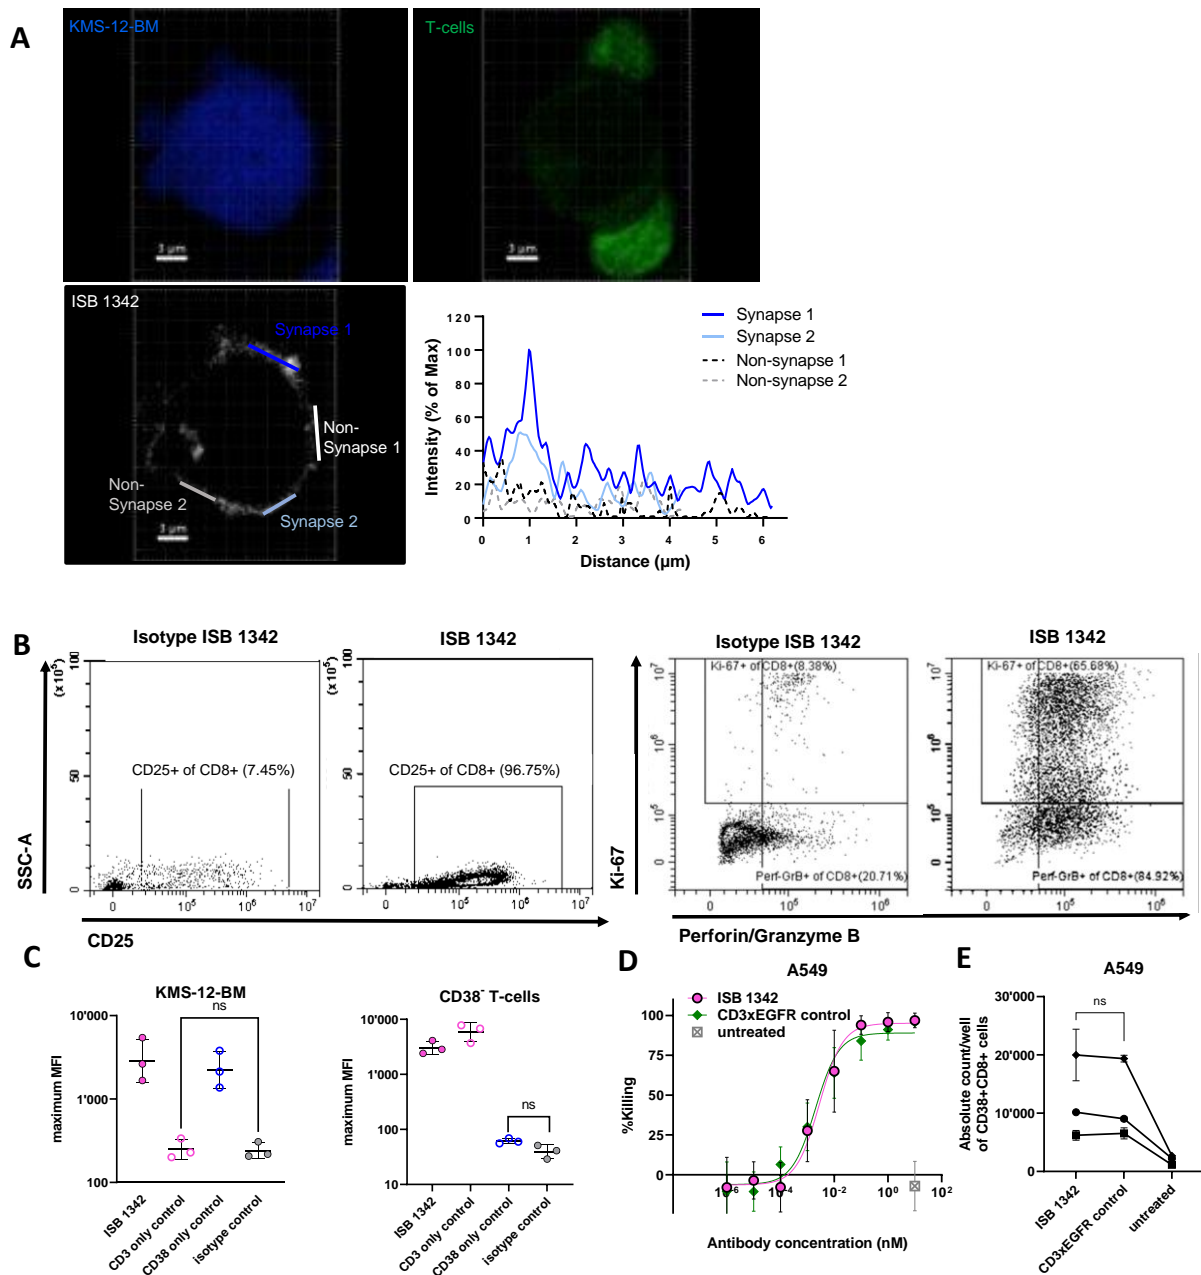

57

58 **Supplementary Figure 2. ISB 1342 binding and activity on MM cells and T-cells. (A)**

59 Confocal images of KMS-12-BM cell line (blue), T-cells (green) and ISB 1342 (white) acquired  
60 with Zeiss LSM 800 inverted confocal microscope and

61 processed with Imaris software. Magnification x40. Intensity of ISB1342 staining was

62 measured at the synapse (blue) and non-synapse (grey/ black/white) locations using Image J

63 Plot profile tool and normalised to maximum intensity. **(B)** Representative dot plots showing

64 activation (CD25), proliferation (Ki-67) and degranulation profile (perforin/granzyme B) on

65 human CD8<sup>+</sup>T-cells from hPBMCs co-cultured with KMS-12-BM cell line upon treatment with

66 maximum dose of ISB 1342 or its isotype control for 72h in a RDL assay. **(C)** Binding of ISB

67 1342 or control molecules on KMS-12-BM cells and on CD38 negative healthy T-cells. Data

68 represent mean  $\pm$  SD from 3 measurements on KMS-12-BM or 3 T-cells donors in 3

69 independent experiments, analyzed using one-way ANOVA and Tukey's post-hoc test, ns: not

70 significant. **(D-E)** Cytotoxicity towards A549 cell line expressing both CD38 and EGFR (D) and

71 absolute count per well of CD8<sup>+</sup>T-cells expressing CD38 (E) after treatment with ISB 1342

72 (10nM) or CD3xEGFR (10nM) control molecule in presence of healthy PBMC (E:T 10:1) for 48

73 hours. Data represent mean  $\pm$  SD from 4 PBMC donors using non-linear regression analysis  
74 (D) or mean  $\pm$  SEM from replicates with treatment at 10nM for each PBMC donor (E, one  
75 line/symbol=1 donor) performed in 2 independent experiments in duplicates. Data was  
76 analysed using a two-way ANOVA and a Tukey's post hoc test.

77

78

79

80

81

82

83

84

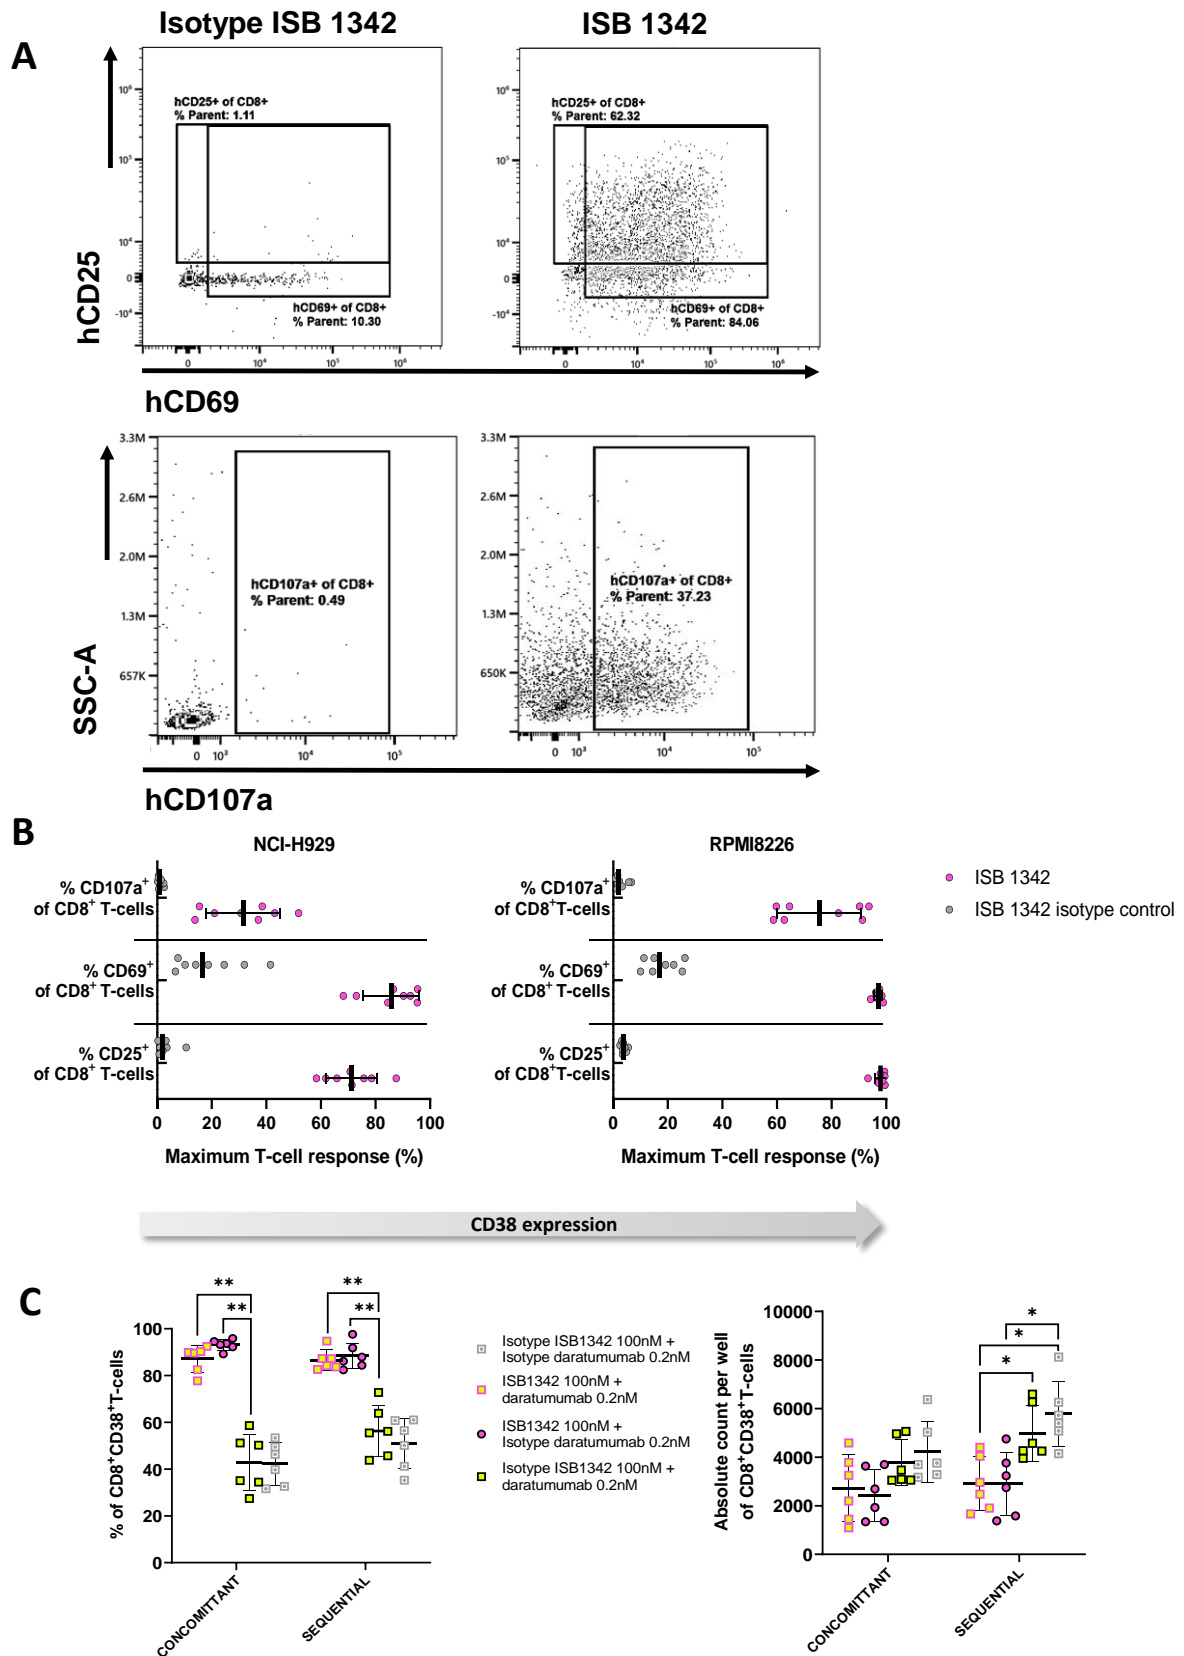

85  
86  
87  
88  
89

**Supplementary Figure 3. T-cell profiling in MMoAK. (A)** Representative dot plots showing activation (CD25, CD69) and degranulation profile (CD107a) on human CD8<sup>+</sup> T-cells from hPBMCs co-cultured with NCI-H929 cell line upon treatment with maximum dose of ISB 1342 or its isotype control for 48h in a MMoAK assay. **(B)** Maximum T-cell response in a MMoAK

90 assay with MM cell lines in presence of ISB 1342 (pink symbols) or its isotype control (grey  
91 symbols), healthy PBMC (E:T 5:1), normal human serum and rhIL-2 for 48 hours. Dots  
92 represent the maximum response for each PBMC donor and bars represent mean  $\pm$  SD of the  
93 maximum response from up to 8 PBMC donors per treatment and cell line from 5 independent  
94 experiments. **(C)** Percentage (left) and absolute count per well (right) of CD38<sup>+</sup>CD8<sup>+</sup>T-cells in  
95 a MMoAK assay with NCI-H929 cell line in presence of a single dose of daratumumab or its  
96 isotype control, treated concomitantly or sequentially with a dose-range of ISB 1342 or its  
97 isotype control. Dots represent the mean of experimental replicates for each PBMC donor and  
98 bars represent mean  $\pm$  SD from 6 PBMC donors from 1 experiment.

99

100

101

102

103

104

105

106

107

108

109

110

111

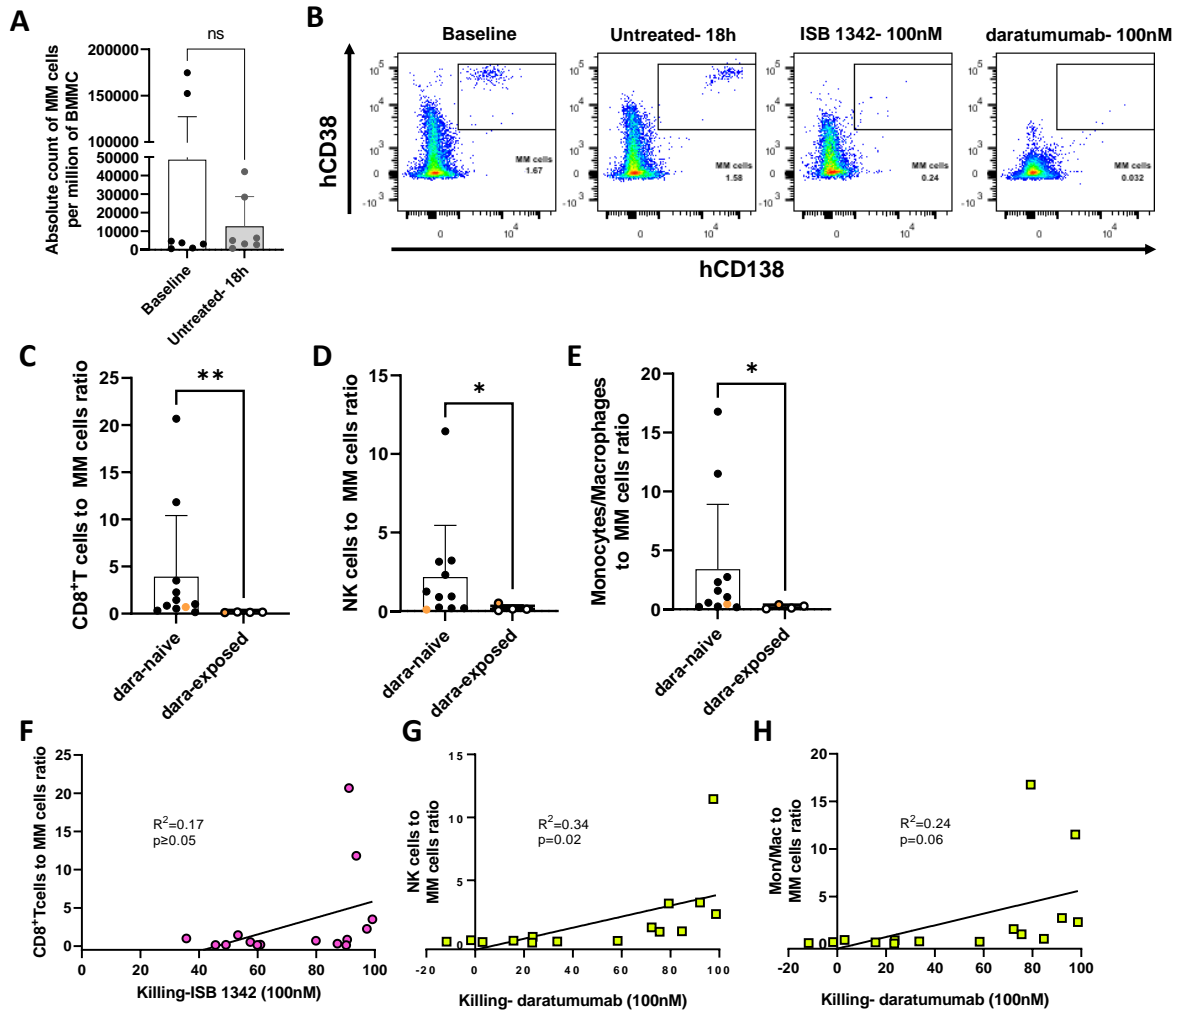

112

113

114

**Supplementary Figure 4: Quantification of effector cells in sample from patients with**

115

**MM. (A)** Absolute count of CD38<sup>+</sup>CD138<sup>+</sup> tumor cells per million of BMMC in MM patient

116

samples at baseline versus 17-24h in culture in untreated conditions. Dots represent individual

117

samples and data are mean  $\pm$  SD compared using a Wilcoxon paired t-test. **(B)**

118

Representative dots plots showing CD38<sup>+</sup>CD138<sup>+</sup> tumor cell population at baseline, after 17-

119

24h in culture, untreated versus ISB 1342 and daratumumab at 100nM from MM patient

120

sample 4. **(C-E)** Ratio of CD8<sup>+</sup>T-cells (C), NK cells (D) and Monocytes/Macrophages (E) to

121

CD38<sup>+</sup>CD138<sup>+</sup> MM tumor cells in patient samples at baseline. PCL patients 1 and 12

122

highlighted in orange are blood samples. Dots represent individual samples and data are

123

mean  $\pm$  SD compared using a Mann-Whitney test. **(F-H)** Correlation between cytotoxicity

124

induced by ISB 1342 (100nM) and CD8<sup>+</sup>T-cells ratio to MM cells in patient samples (F), and

125

between cytotoxicity induced by daratumumab (100nM) and NK cells (G) as well as

126

Monocytes/Macrophages (H) (Mon/Mac). Dots represent individual samples and data are

127

analysed using linear regression.

128



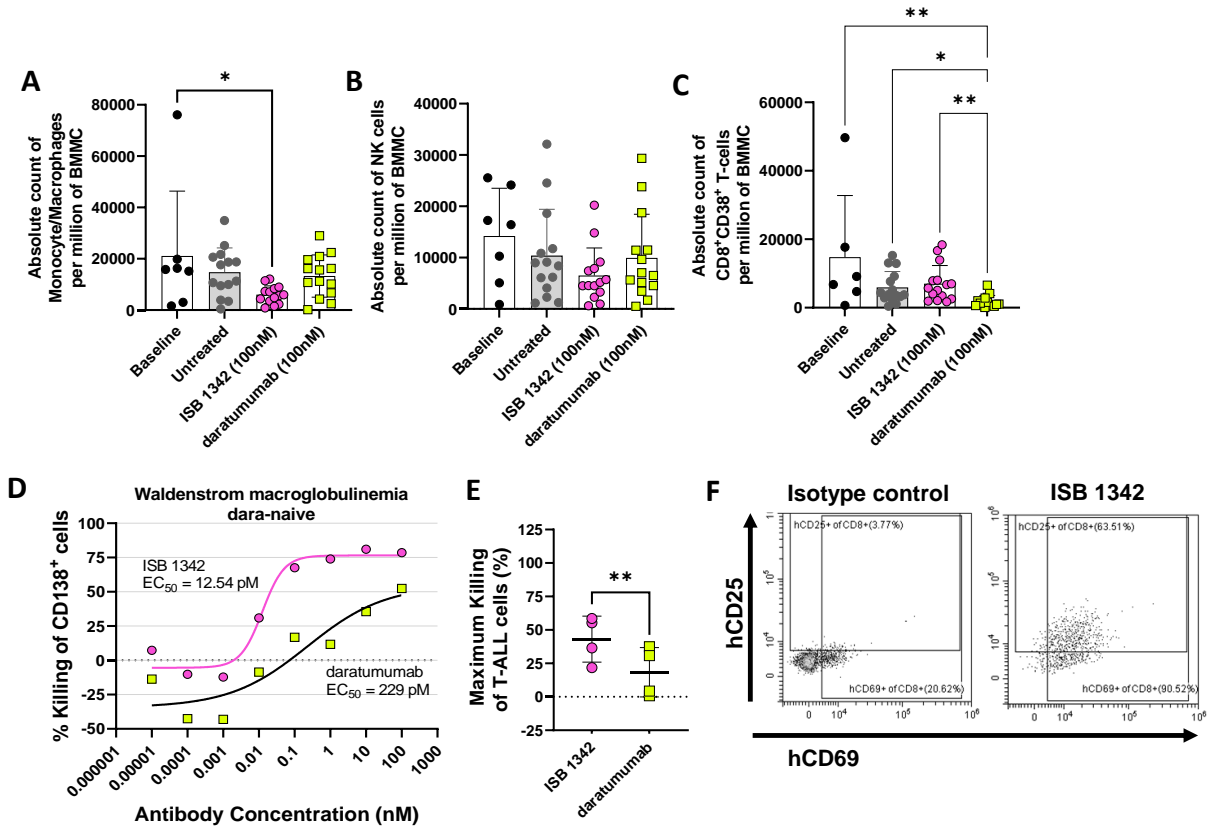

129

130 **Supplementary Figure 5: ISB 1342 does not deplete other CD38<sup>+</sup> cells and induces**  
 131 **cytotoxicity towards Waldenstrom macroglobulinemia and T-cell acute lymphoblastic**  
 132 **leukemia (T-ALL). (A-C)** Absolute count of monocytes/macrophages (A), NK cells (B) and  
 133 CD8<sup>+</sup>CD38<sup>+</sup> T-cells (C) per million of BMMC in MM patient samples at baseline, and after 17-  
 134 24h culture in untreated, ISB 1342 (100nM) and daratumumab (100nM) treated conditions.  
 135 Dots represent individual samples and data are mean ± SD compared using a one-way  
 136 ANOVA followed by a Tukey's (A) or Kruskal-Wallis (B, C) post-hoc analysis. (D)  
 137 Representative

138 cytotoxicity curves of CD138<sup>+</sup> MM cells by ISB 1342 and daratumumab at 24h in samples from  
 139 a patient with Waldenstrom macroglobulinemia. Data is mean ± SEM of replicates analysed  
 140 using non-linear regression analysis. (E) Maximal cytotoxicity of T-ALL with ISB 1342 or  
 141 daratumumab in PBMC or BMMC samples from patients with T-ALL. Dots represent individual  
 142 samples and data is mean ± SD compared using a paired t-test. (F) Representative dot plots  
 143 showing activation profile (CD25 and CD69 expression) of human CD8<sup>+</sup> T-cells from BMMC of  
 144 one MM patient upon treatment with ISB 1342 or its isotype control for 48h in an ex vivo killing  
 145 assay (patient sample 2).  
 146

147

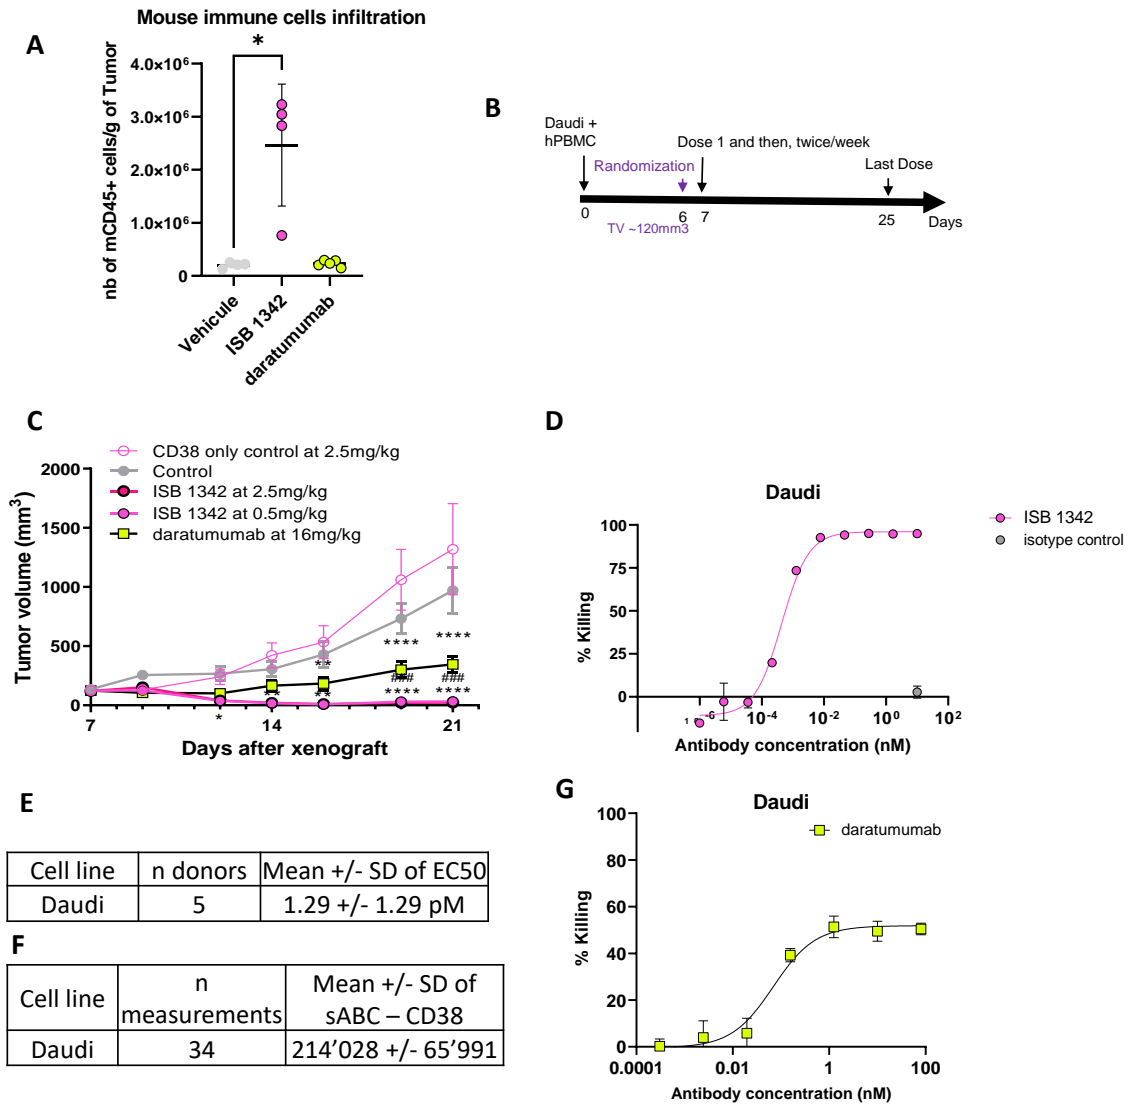

148  
149 **Supplementary Figure 6. ISB 1342 activity *in vivo*.** (A) Infiltration of murine (m) CD45+ cells  
150 (defined as live hCD45<sup>-</sup>mCD45<sup>+</sup>) in tumors of KMS-12-BM xenografted mice after vehicle, ISB  
151 1342 or daratumumab treatments. Data are mean  $\pm$  SD for 5 mice compared using one-way  
152 ANOVA followed by Dunnet's post-hoc test to vehicle. \* $p < 0.05$ . (B-C) Experimental design (B)  
153 and measurement of tumor growth (C) in the Daudi s.c. xenograft human PBMC (hPBMC)-  
154 transferred NOD-SCID mouse model (B). *In vivo* activity was followed for ISB 1342 at 0.5 or  
155 2.5 mg/Kg and daratumumab at 16 mg/Kg injected i.v. twice per for three weeks with 4-5 mice  
156 per group. Data are mean mm<sup>3</sup>  $\pm$  standard error of the mean (SEM) determined by caliper  
157 measurements. Data were compared for both models using two-way ANOVA followed by  
158 Tukey's post-hoc comparison. \* is showing significant differences between ISB1342 and  
159 vehicle control; # is showing differences between daratumumab and ISB 1342. (D)  
160 Cytotoxicity of Daudi cell line after treatment with ISB 1342 or control molecules in presence of  
161 healthy PBMC (E:T 5:1) for 72 hours. Data represent mean  $\pm$  SD from duplicates for one  
162 representative PBMC donor. (E) Mean +/- SD of EC50 of Daudi cell line cytotoxicity induced  
163 by ISB 1342 in presence of 5 healthy PBMC donors in 3 independent experiments. (F)  
164 Absolute number of specific Antibody Bound per Cell (sABC) for CD38 indicating the relative  
165 target density on Daudi cell line. (G) Cytotoxicity of Daudi cell line in a Multiple Mode of Action  
166 Killing *in vitro* assay (MMoAK) in presence of daratumumab, healthy PBMC (E:T 5:1), normal  
167 human serum and rhIL-2 for 48 hours. Data represent mean  $\pm$  SD of duplicates from one  
168 representative donor.  
169

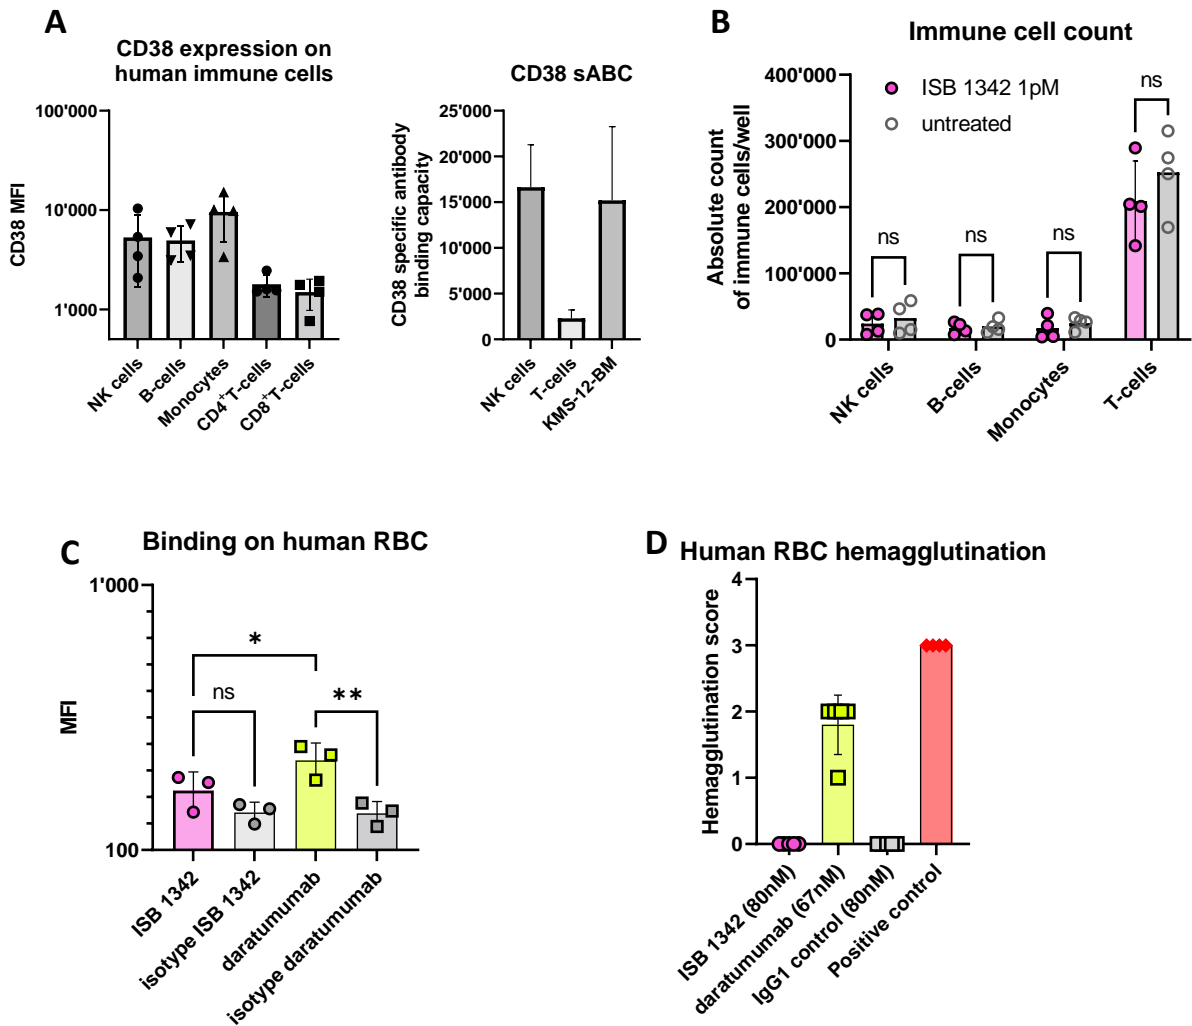

171  
 172 **Supplementary Figure 7. ISB 1342 safety profile on human immune cells and Red Blood**  
 173 **cells (RBC).** (A) CD38 expression (left) on NK cells (CD56<sup>+</sup>), B-cells (CD20<sup>+</sup>), monocytes  
 174 (CD14<sup>+</sup>) and CD4<sup>+</sup> or CD8<sup>+</sup> T-cells in PBMC from human healthy donors. Each dot represents  
 175 the log of the MFI for one donor and the bars the log of the mean ± SD of 4 donors from 2  
 176 independent experiments. Absolute number (right) of specific Antibody Bound per Cell (sABC)  
 177 indicating the relative CD38 density on MM cell lines. Data represent mean ± SD of 10 to 63  
 178 measurements per cell type. (B) Absolute count of NK cells (CD56<sup>+</sup>), B-cells (CD20<sup>+</sup>),  
 179 monocytes (CD14<sup>+</sup>) and T-cells (CD3<sup>+</sup>) in an *in vitro* assay where PBMC from healthy donors  
 180 were incubated with ISB 1342 or its isotype control for 48 hours. The absolute count per well  
 181 was measured by flow-cytometry. Each dot represents one PBMC donor and the bars mean ±  
 182 SD of 4 donors from 2 independent experiments compared using a two-way ANOVA followed  
 183 by Sidak's post-hoc analysis. (C) Binding on human RBC of ISB 1342 and daratumumab or  
 184 their isotype controls. Each dot represents the log of the MFI for one RBC donor and the bars  
 185 the log of the mean ± SD of 3 donors from 1 experiment that were compared using a one-way  
 186 ANOVA followed by a Tukey post-hoc comparison. (D) Human RBC agglutination by indirect  
 187 Coombs agglutination assay. Each symbol represents the hemagglutination score for one  
 188 RBC donor, bars represent mean ± SD of 5 donors.  
 189

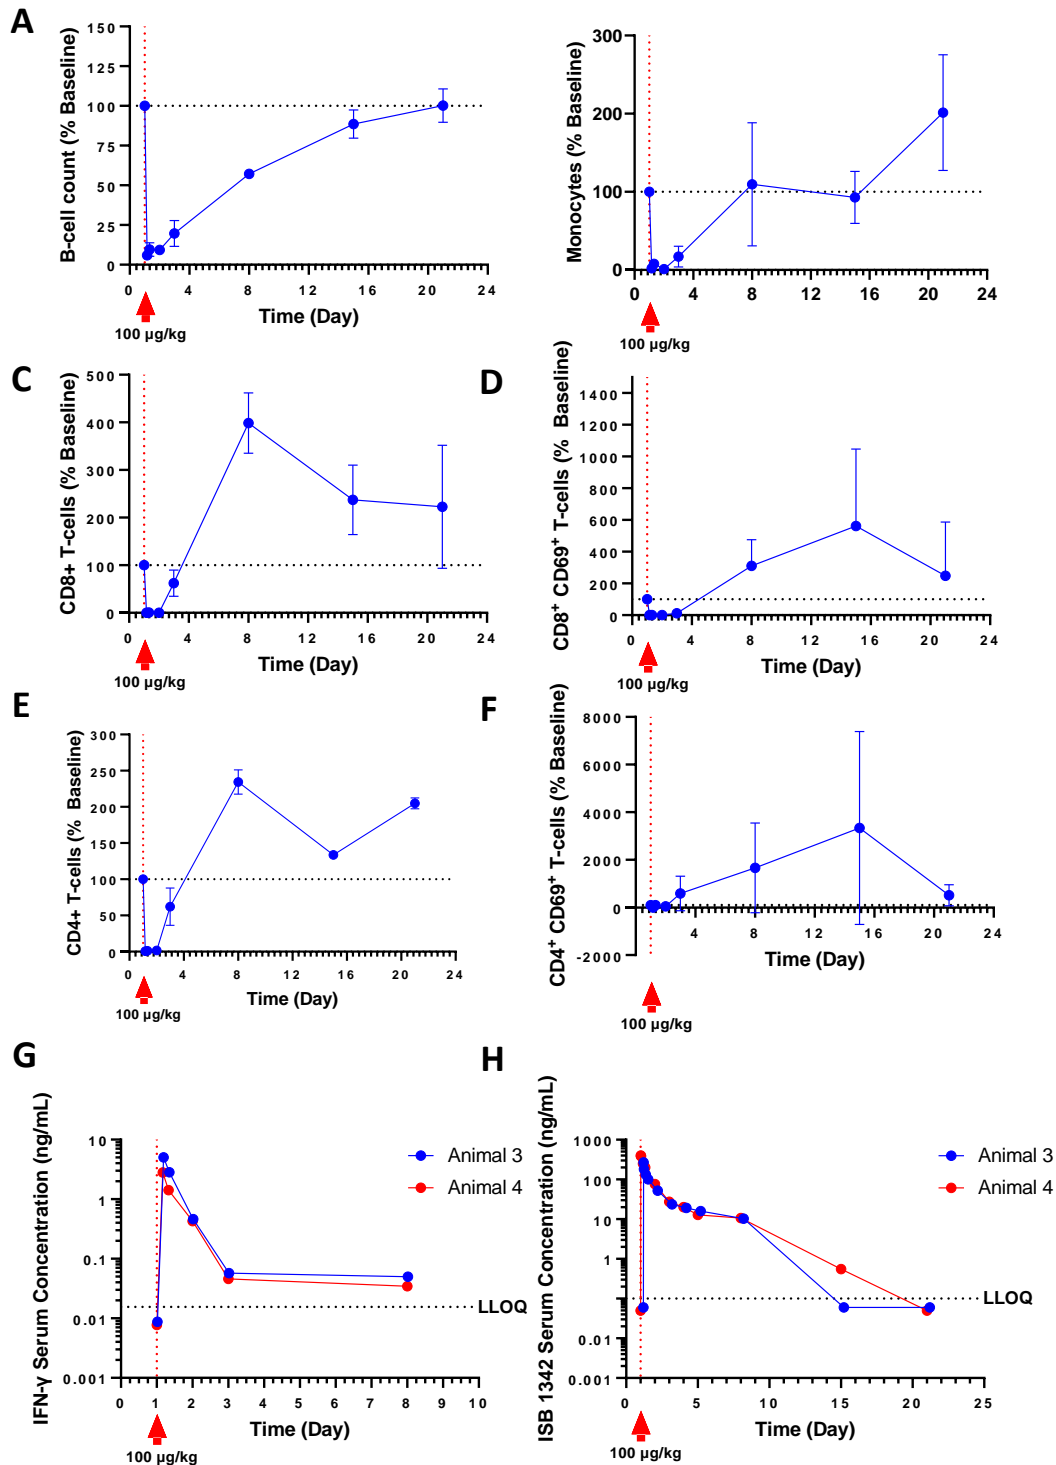

190

191 **Supplementary Figure 8: Impact of ISB 1342 on circulating leukocytes and systemic**  
 192 **soluble factors in cynomolgus monkeys.** (A-F) Cynomolgus monkeys were injected with  
 193 one single dose of ISB 1342 i.v. (100 µg/kg) at day 1. Levels of peripheral B-cells (A),  
 194 monocytes (B), CD8<sup>+</sup> T-cells (C), activated CD8<sup>+</sup> CD69<sup>+</sup> T-cells (D), CD4<sup>+</sup> T-cells (E) and  
 195 activated CD4<sup>+</sup> CD69<sup>+</sup> T-cells (F) were measured using flow cytometry. Data represent mean  
 196 ± SD of 10<sup>3</sup> counts/µl normalized to baseline counts for two animals (one male, one female).  
 197 (G, H) Levels of circulating IFN-γ (G) and ISB 1342 (H) were measured using ELISA. Data  
 198 represent levels per animal and LLOQ is the lower limit of quantification for the assay.

199 **Supplementary Tables**200 **Supplementary Table 1: List of antibodies and labelling reagents.**

| <b>Antibody</b>        | <b>Clone</b> | <b>Supplier</b>                           | <b>Assay</b>                              |
|------------------------|--------------|-------------------------------------------|-------------------------------------------|
| CFSE                   | NA           | Sigma-Aldrich                             | RDL                                       |
| eFluor 670             | NA           | ThermoFisher                              | RDL, MMoAK                                |
| Anti-human CD25        | BC96         | ThermoFisher                              | RDL, MMoAK                                |
| Anti-human Ki-67       | SolA15       | ThermoFisher                              | RDL                                       |
| Anti-human granzyme B  | MA523639     | ThermoFisher                              | RDL                                       |
| Anti-human perforin    | 353320       | Biologend                                 | RDL                                       |
| Anti-human CD107a      | eBioH4A3     | ThermoFisher                              | MMoAK                                     |
| Anti-human CD138       | MI15         | ThermoFisher                              | Patients                                  |
| Anti-human CD138       | 281-2        | Biologend                                 | Patients                                  |
| Anti-human CD4         | SK3          | Biologend or Cytex                        | Patients                                  |
| Anti-human CD25        | BC96         | Biologend or BD Biosciences               | Patients                                  |
| Anti-human CD69        | FN50         | ThermoFisher, BD Biosciences or Biologend | Patients, MMoAK, In vivo mouse model      |
| Anti-human CD107a      | H4A3         | BD Biosciences or Biologend               | Patients                                  |
| Anti-mouse CD45        | 30-F11       | ThermoFisher                              | In vivo mouse model                       |
| Anti-human CD14        | M5E2         | BD Biosciences                            | In vivo mouse model                       |
| Anti-human CD19        | HIB19        | ThermoFisher                              | In vivo mouse model                       |
| Anti-human CD56        | NCAM16.2     | BD Biosciences                            | In vivo mouse model                       |
| Anti-human CD45        | HI30         | Biologend                                 | In vivo mouse model                       |
| Anti-human TCRab       | IP26         | Biologend                                 | In vivo mouse model                       |
| Anti-human CD4         | OKT4         | BD Biosciences                            | In vivo mouse model                       |
| Anti-human CD8         | SK1          | BD Biosciences, Biologend or Cytex        | RDL, MMoAK, Patients, in vivo mouse model |
| Anti-human CD25        | M-A251       | Biologend, BD Biosciences                 | MMoAK, in vivo mouse model                |
| Anti-cyno CD14         | M5E2         | BD Biosciences                            | In vivo cyno study                        |
| Anti-cyno CD4          | M-T477       | BD Biosciences                            | In vivo cyno study                        |
| Anti-cyno CD8          | RPA-T8       | BD Biosciences                            | In vivo cyno study                        |
| Anti-cyno CD20         | 2H7          | BD Biosciences                            | In vivo cyno study                        |
| Anti-cyno CD69         | L78          | BD Biosciences                            | In vivo cyno study                        |
| Live/Dead fixable dyes | NA           | ThermoFisher                              | RDL, patient                              |
| SYTOX dyes             | NA           | ThermoFisher                              | RDL, MMoAK                                |
| 7-AAD                  | NA           | ThermoFisher                              | RDL                                       |
| FVS700                 | NA           | BD Biosciences                            | In vivo mouse model                       |
| Anti-human CD10        | HI10a        | BD Biosciences                            | Patients                                  |
| Anti-human CD117       | A3C6E2       | Biologend                                 | Patients                                  |
| Anti-human CD19        | HIB19        | ThermoFisher                              | Patients                                  |
| Anti-human CD3         | SK7          | Biologend                                 | Patients                                  |
| Anti-human CD34        | 4H11         | ThermoFisher                              | Patients                                  |
| Anti-human CD38        | polyclonal   | Cytognos/MedTech                          | Patients                                  |
| Anti-human CD45        | 2D1          | Biologend                                 | Patients                                  |
| Anti-human CD56        | B159         | BD Biosciences                            | Patients                                  |
| Anti-human CD11b       | M1/70        | BD Biosciences                            | Patients                                  |
| Anti-human CD11c       | 3.9          | Biologend                                 | Patients                                  |
| Anti-human PD-1        | EH12.2H7     | Biologend                                 | Patients                                  |
| Anti-human TIM-3       | 7D3          | BD Biosciences                            | Patients                                  |
| Anti-human LAG-3       | 11C3C65      | Biologend                                 | Patients                                  |
| Anti-human CD4         | OKT4         | ThermoFisher                              | CD38 level on human immune cells          |
| Anti-human CD8         | SK1          | Biologend                                 | CD38 level on human immune cells          |
| Anti-human CD56        | TULY56       | ThermoFisher                              | CD38 level on human immune cells          |
| Anti-human CD20        | 2H7          | Biologend                                 | CD38 level on human immune cells          |
| Anti-human CD14        | MEM-15       | ThermoFisher                              | CD38 level on human immune cells          |
| Anti-human CD38        | HIT2         | ThermoFisher                              | CD38 level by flow-cytometry              |

201

202

203

204

205 **Supplementary Table 2: Culture media for *in vitro* and *ex vivo* assay**

| <b>Assay</b>              | <b>Media composition</b>                                                                             |
|---------------------------|------------------------------------------------------------------------------------------------------|
| <b>RDL, HD-PBMC</b>       | RPMI1640, 1% Penicillin/Streptomycin, 1%L-Glutamine, 10%heat inactivated fetal bovine serum (Hi FBS) |
| <b>MMoAK</b>              | RPMI1640, 1% Penicillin/Streptomycin, 1% L-Glutamine, 50%Human Serum (HS) and 100U/ml hIL-2          |
| <b>MM Patient samples</b> | RPMI1640, 1% Penicillin/Streptomycin, 1% L-Glutamine, 10%Human Serum (HS) and 3µg/ml hIL-6           |

206

207 **Supplementary Table 3: Disease stage of patient samples included in the *ex vivo* study**

| <b>Patient samples Nb</b>        | <b>Disease Stage</b> | <b>Treatment history</b>                                                                                                                                              |
|----------------------------------|----------------------|-----------------------------------------------------------------------------------------------------------------------------------------------------------------------|
| <b>dara-naïve</b>                |                      |                                                                                                                                                                       |
| 1                                | PCL                  | none                                                                                                                                                                  |
| 2                                | Smoldering MM        | none                                                                                                                                                                  |
| 3                                | Smoldering MM        | none                                                                                                                                                                  |
| 4                                | Newly diagnosed MM   | none                                                                                                                                                                  |
| 5                                | Newly diagnosed MM   | none                                                                                                                                                                  |
| 6                                | Newly diagnosed MM   | none                                                                                                                                                                  |
| 7                                | Newly diagnosed MM   | none                                                                                                                                                                  |
| 8                                | r/rMM- dara-naïve    | (1) Carfilzomib, Cyclophosphamide, Dexamethasone, (2) Carfilzomib maintenance, (3) Melphalan-autograft                                                                |
| 9                                | r/rMM- dara-naïve    | (1) Velcade, Revlimid, Dexamethasone and Autograft                                                                                                                    |
| 10                               | r/rMM- dara-naïve    | (1) Velcade, Thalidomide, Dexamethasone, (2) Velcade, Endoxan, Dexamethasone, (3) Revlimid, Dexamethasone, Autograft                                                  |
| 11                               | r/rMM- dara-naïve    | (1) Velcade, Thalidomide, Dexamethasone, (2) Carfilzomib, Revlimid, Dexamethasone                                                                                     |
| <b>dara-exposed &lt;3 months</b> |                      |                                                                                                                                                                       |
| 12                               | PCL                  | (1) Thalidomide-Dexamethasone-Autograft, (2)Velcade-Thalidomide-Dexamethasone-Autograft, (3) daratumumab-Revlimid-Dexamethasone, (4)Velcade-Dexamethasone-daratumumab |
| 13                               | r/rMM                | (1) Velcade-Revlimid-Dexamethasone, (2) daratumumab-Ixazomib                                                                                                          |

| dara-exposed >3 months |       |                                                                                                                                                                  |
|------------------------|-------|------------------------------------------------------------------------------------------------------------------------------------------------------------------|
| 14                     | r/rMM | (1) Dexamethasone-autograft, (2) Revlimid-Dexamethasone, (3) Velcade-Thalidomide-Dexamethasone, (4) Pomalidomide-Dexamethasone, (5) daratumumab, (6) Elranatanab |
| 15                     | r/rMM | (1) Velcade-Revlimid-Dexamethasone, (2) daratumumab-KRD (Carfilzomib-Revlimid-Dexamethasone)                                                                     |

208 Nb: Number  
 209 PCL: Plasma Cell Leukemia  
 210 MGUS: Monoclonal gammopathy of undetermined significance  
 211 r/rMM: relapsed/refractory Multiple Myeloma  
 212 dara: daratumumab

213

214 **Supplementary Table 4: Summary PK Parameters of ISB 1342 in Cynomolgus Monkeys:**  
 215 single dose study

| Dose level (µg/kg) | C <sub>0</sub> (ng/mL) | C <sub>max</sub> (ng/mL) | T <sub>max</sub> (hr) | AUC <sub>0-t</sub> (hr*ng/mL) | t <sub>last</sub> (hr) | AUC <sub>0-∞</sub> (hr*ng/mL) | t <sub>1/2</sub> (hr) | ADA detected |
|--------------------|------------------------|--------------------------|-----------------------|-------------------------------|------------------------|-------------------------------|-----------------------|--------------|
| 100                | 409                    | 334                      | 0.5                   | 6852                          | 252                    | 8511 <sup>a</sup>             | 52.6 <sup>a</sup>     | Day 15       |

216 <sup>a</sup> N=1  
 217 AUC<sub>0-∞</sub> = area under the (serum) concentration time curve extrapolated out to infinity; AUC<sub>0-t</sub> =  
 218 area under the plasma concentration-time curve from time zero to time t; C<sub>0</sub> = initial  
 219 concentration; NE: Not Estimable; t<sub>1/2</sub>= terminal elimination half-life; t<sub>last</sub> = time of the last  
 220 measurable (positive) concentration; T<sub>max</sub>= Time to reach maximum serum concentration  
 221 following drug administration. ADA = Anti-Drug Antibodies.

222

## 223 Supplementary Material and Methods

224

### 225 Dara sharing statement

226 For original data, please contact Dr Mario Perro: [mario.perro@ichnossciences.com](mailto:mario.perro@ichnossciences.com)

### 227 Affinity measurements by Surface Plasmon Resonance (SPR)

228 Binding of ISB 1342 to CD3εδ and CD38 was evaluated by SPR on a Biacore T200  
 229 instrument. For CD38 binding, biotinylated human CD38 AviTag-hisTag protein  
 230 (Acrobiosystems) was immobilized on a Series S Biotin Capture sensor chip (CAP) according  
 231 to the manufacturer's instructions and increasing concentrations of ISB 1342 were flushed onto  
 232 the immobilized ligand. For CD3εδ binding, human CD3E&CD3D-his protein (Creative Biomart)  
 233 was immobilized on a Series S CM5 sensor chip according to the manufacturer's instructions  
 234 and increasing concentrations of ISB 1342 were flushed onto the immobilized ligand. Data were  
 235 analysed in the Biacore evaluation software and fit to a 1:1 binding model to infer dissociation  
 236 constants (K<sub>D</sub>).

237

### 238 Flow cytometry analysis

239 Cytoflex or Cytoflex S (Beckman Coulter), iQue (Sartorius) or Aurora (Cytex) for FACS  
 240 analysis and analysed using either FlowJo (Becton Dickinson), CytExpert (Beckman Coulter),



241 Spectroflo (Cytex), or Forecyt (Sartorius) software. Antibodies and live/dead dyes are listed in  
242 **Supplementary Table 1** for each assay.

### 243 **Flow cytometry Cell-based Affinity assay (CBA)**

244 Cells were incubated with increasing doses of ISB 1342, daratumumab (Darzalex®,  
245 Janssen Biotech Inc.) or control molecules in a 96-well plate at 4°C in the dark. A labelled anti-  
246 human Fc monoclonal antibody was then added to the mixture, for T-cells an anti-human CD38  
247 (HIT2 or multi-epitope), was also added and incubation was performed at 4°C and in the dark.  
248 Cells were finally resuspended in FACS buffer containing viability dye (SYTOX) and acquisition  
249 was performed on a flow cytometer (Cytoflex or Cytoflex S). The Geometric Mean of  
250 Fluorescence Intensities (MFI) of the viable single cells (CD38- for T-cells) was extracted using  
251 FlowJo. The values of MFI from the control antibodies (ISB 1342\_DUaDUa for ISB 1342, and  
252 ABC1 for daratumumab) were subtracted to the MFI values of ISB 1342 or daratumumab to  
253 generate the relative fluorescence intensity (RFI). The  $K_D$  was calculated with the RFI using a  
254 non-linear one site binding (hyperbola) regression.

### 255 **Epitope mapping of h9G7**

256 To map the epitope of h9G7, the extracellular domain of CD38 was divided in 19 13-amino acid  
257 long peptides and a final, 11-amino acid long peptide that were fused onto an IgG1 Fc via a  
258 linker. The binding of each peptide to h9G7 was evaluated by SPR on a Biacore T200  
259 instrument.

### 260 **Competition of ISB 1342 with daratumumab by BioLayer Interferometry (BLI)**

261 Competition of ISB 1342 with daratumumab was assessed using BLI. Measurements were done  
262 on an OctetRED96e instrument (Sartorius) and analyzed using the Data Analysis version 11.1  
263 software (Octet, Sartorius). Biotinylated recombinant human CD38-AviTag-HisTag  
264 (Acrobiosystems) was loaded onto Streptavidin (SA) Biosensor (Sartorius). The sensor was  
265 then dipped into a saturating solution of daratumumab or ISB 1342, followed by a mixture of  
266 both. An increase in signal upon dipping in the mixture was indicative of a lack of competition  
267 between ISB 1342 and daratumumab.

### 268 **Affinity measurements to Fc receptors by Surface Plasmon Resonance**

269 Binding of ISB 1342 and its Fc competent counterpart to the Fcγ Receptors was evaluated by  
270 SPR on a Biacore 8K instrument. For CD64 binding, biotinylated CD64 was immobilized onto a  
271 CAP chip according to the manufacturer's instructions and increasing concentrations of  
272 ISB 1342 were flushed onto the immobilized ligand in single-cycle kinetics mode. Data were  
273 analysed in the Biacore evaluation software and fit to a 1:1 binding model to infer  $K_D$ . For CD16a,  
274 CD32a and CD32b binding, the antibody constructs were immobilized on a Protein G Series S  
275 CM5 chip prepared according to the manufacturer's instructions and increasing concentrations  
276 of the receptors were flushed onto the immobilized antibody constructs. The binding  $K_D$  to  
277 CD16a, CD32a and CD32b were measured using a steady state affinity model.

### 278 **Soluble factors measurements**

279 The quantification of cytokines in the supernatant of RDL after 48 hours of treatment was  
280 assessed by ELISA (BD OptEIA™, BD Biosciences) following manufacturer's instructions.  
281 Briefly, plates were coated with capture antibodies (anti-TNFα, anti-IFNγ anti-IL-6 or anti-IL-2)  
282 overnight at 4°C. Plates were then sequentially blocked, incubated with supernatant or standard  
283 and finally with detection antibody associated with horseradish peroxidase (HRP) enzyme.  
284 Addition of TMB substrate allowed release of a colorimetric product which was quantified using  
285 absorbance plate reader (Biotek Synergy).

### 286 **Confocal live imaging**

287 KMS-12-BM cells were stained with of CellTracker™ Blue Dye (10μM) and co-plated with T-  
288 cells from healthy donor labelled with CellTracker™ Orange Dye (2μM) at an E:T of 5:1. ISB  
289 1342 (10nM) was labeled using Fab anti-Fc-AlexaFluor647 (Zenon™, Thermofisher) and added  
290 to the cells on ibiTreat pre-coated slides (Ibidi) for 5 hours at 37°C. Live microscopy was carried  
291 out using a Zeiss LSM800 inverted confocal microscope incubation system (Carl Zeiss). Images



292 were processed with Imaris software (Oxford Instruments) and composite is shown (blue for  
293 KMS-12-BM, green for T cells and white for ISB 1342).

#### 294 **Specific Antibody Bound per Cell (sABC) by flow cytometry**

295 Expression levels of CD38 on KMS-12-BM, NCI-H929, RPMI 8226 and MOLP-8 cell lines  
296 were determined by flow-cytometry using QIFIKIT<sup>®</sup> reagents (Dako) according to  
297 manufacturer's instructions. An anti-human CD38 (HIT2; Thermofisher) was used as primary  
298 antibody at 10µg/ml and CD38 sABC (specific Antibody Binding Capacity) value was  
299 calculated using the QIFIKIT calibration standards and formulation provided by the kit.

#### 300 **CD38 expression level on human primary immune cells**

301 Expression level of CD38 on primary immune cells were determined by flow-cytometry.  
302 Human PBMC from healthy donors were stained with labelled antibodies targeting CD56,  
303 CD20, CD14, CD4, CD8 and CD38. The geomean of fluorescence intensity of CD38 was  
304 exported for each subpopulation of immune cells.

#### 305 **Binding to human red blood cells**

306 Human red blood cells (RBC) were stained with ISB 1342, daratumumab or their isotype  
307 controls at 80nM and detected with a labelled anti-human Fc secondary antibody. The  
308 geomean of fluorescence intensity reflecting the antibody binding was measured by flow-  
309 cytometry.

#### 310 **Antibody-Dependant Cellular Phagocytosis assay (ADCP)**

311 Monocytes were isolated from healthy PBMC by immunomagnetic negative selection (Stemcell)  
312 following manufacturer's instructions. Isolated monocytes were culture for 7-10 days with  
313 RPMI1640 10%HiFBS, 1% Penicillin/Streptomycin (P/S), 1% L-Glutamine (Gln) supplemented  
314 with 50ng/ml rhM-CSF (Peprotech) to generate monocyte-derived-macrophages (MDM) used  
315 as effector cells. MDM were harvested using cell dissociation buffer (Thermofisher), stained with  
316 2.5 µM CellTrace<sup>™</sup> violet (Thermofisher) and resuspended in RPMI1640 10%HiFBS, 1% P/S,  
317 1% Gln medium. Similarly, target tumor cell lines were labeled with 500ng/ml of pRhodo red<sup>™</sup>  
318 (Thermofisher). Cell lines were then co-cultured with MDM into a 96 well plate at an E:T of 1:3  
319 in presence of increasing concentrations of daratumumab – starting at 80nM - for 2 hours and  
320 half at 37°C + 5% CO<sub>2</sub> in a humidified atmosphere. Plates were acquired using CX5 high  
321 content image system (Thermofisher) and analyzed using HCS studio. Phagocytosis index was  
322 calculated as average number of phagocytosed cells for 100 macrophages.

#### 323 **Antibody-Dependant Cellular Cytotoxicity assay (ADCC)**

324 NK cells were isolated from healthy PBMC by immunomagnetic negative selection (Stemcell)  
325 following manufacturer's instructions and rested overnight in RPMI1640 10%HiFBS, 1% P/S,  
326 1% Gln. NK effector cells were then co-cultured into a 96-well plate with target tumor cell lines  
327 previously labelled with calcein AM 5 µM (Sigma). Cells were co-cultured at an E:T of 5:1 with  
328 increasing concentrations of daratumumab – starting at 80nM - for 4 hours and half at 37°C with  
329 5% CO<sub>2</sub> in a humidified atmosphere. Calcein release was assessed in the supernatant using  
330 fluorescence plate reader (Biotek Synergy). Triton-lysed tumor cells was used as positive  
331 control for maximum release and tumor cells only as spontaneous release; percentage of  
332 cytotoxicity was calculated relative to maximum and spontaneous release.

#### 333 **Complement-Dependent Cytotoxicity assay (CDC)**

334 Target tumor cell lines were labelled with calcein AM 5 µM (Sigma), resuspended in RPMI1640  
335 1% P/S, 1% Gln and mixed with increasing concentrations of daratumumab – starting at 160nM  
336 - in a 96-well plate in presence of 50% Human Serum (HS; Sigma) for 4 hours and half at 37°C  
337 with 5% CO<sub>2</sub> in a humidified atmosphere. Calcein release was assessed in the supernatant  
338 using fluorescence plate reader (Biotek Synergy). Triton-lysed tumor cells was used as positive  
339 control for maximum release and tumor cells only as spontaneous release; percentage of  
340 cytotoxicity was calculated relative to maximum and spontaneous release.

#### 341 **T-cell fratricide in Re-directed Lysis (RDL) *in vitro* assay**

342 A549 cell line expressing both CD38 and EGFR was co-cultured for 48 hours with hPBMCs at  
 343 an effector to target ratio (E:T) of 10:1 with ISB 1342 or a CD3xEGFR BEAT<sup>®</sup> control molecule  
 344 including the same CD3 binder than ISB 1342 and a high affinity for EGFR that are not  
 345 expressed on hT-cells in contrast to CD38. The A549 cell killing was measured using the  
 346 CellTiter 96<sup>®</sup> AQueous Non-Radioactive Cell Proliferation Assay (Promega) and normalized  
 347 with the untreated and non-effector cells conditions. The proportion of T-cell expressing CD38  
 348 was measured by flow-cytometry.

349

350 ***in vitro* HD-PBMC assay**

351 Human PBMC from healthy donors were cultured for 48 hours at 10\*10<sup>6</sup> cells/ml and then for  
 352 an additional 48 hours at 1\*10<sup>6</sup> cells/ml in presence of increasing doses of ISB 1342 at 37°C  
 353 with 5% CO<sub>2</sub> in a humidified atmosphere. The count of live immune cells per well, defined as  
 354 viability dye negative and CD56+ for NK cells, CD20+ for B cells, CD14+ for myeloid cells and  
 355 CD4+orCD8+ for T-cells, was measured by flow-cytometry and compared to the untreated  
 356 condition.

357 ***ex vivo* assay on T-ALL patient samples**

358 0.1 x10<sup>6</sup> BMMC or PBMC were incubated with ISB 1342 500nM or daratumumab 80nM for 18-  
 359 24 hours at 37°C in IMDM, 1% P/S, 1% Glutamine, 10%FBS,10%Human Serum (HS) SCF (50  
 360 ng/ml, Bio-Techne), Flt3L (20 ng/ml, Peprotech), IL-7 (10 ng/ml, Bio-Techne), insulin (116 ng/ml,  
 361 Sigma) and IL-3 (20ng/ml, Peprotech). The T-ALL blast killing was measured by flow cytometry  
 362 as the decrease of the remaining live blasts count (based on viability dye staining) after  
 363 treatment normalized with the untreated condition. The gating strategy to define tumor cells was  
 364 adjusted to each sample, from parent gate *live CD11b<sup>-</sup>CD11c<sup>-</sup>NOT(CD3<sup>high</sup>CD45<sup>high</sup>)*;

365

| In-house patient sample ID | Source | Blasts gating strategy                                     |
|----------------------------|--------|------------------------------------------------------------|
| B-T-ALL-13                 | BMMC   | CD10 <sup>+</sup> CD38 <sup>+/-</sup>                      |
| B-T-ALL-7                  | BMMC   | CD34 <sup>+</sup> CD117 <sup>+</sup>                       |
| B-T-ALL-1                  | BMMC   | CD45 <sup>low</sup> of CD19 <sup>-</sup> CD56 <sup>-</sup> |
| P-T-ALL-1                  | PBMC   | CD45 <sup>low</sup> of CD19 <sup>-</sup> CD56 <sup>-</sup> |

366

367 ***In vivo* efficacy mouse model: Daudi tumors**

368 The *in vivo* studies were performed with 6/7-week-old immunodeficient female  
 369 NOD.CB17/Alhnrj-Prkdcscid/Rj (NOD/SCID) mice from Janvier labs and conducted according  
 370 to the Swiss Animal Protection Law with authorization from the cantonal and federal veterinary  
 371 authorities. For the Daudi study, 5.10<sup>6</sup> Daudi cells and 5.10<sup>6</sup> hPBMC were injected  
 372 subcutaneously (s.c.). Treatments were injected intravenously (i.v.) 7 days after, when tumors  
 373 reached an average volume of 120mm<sup>3</sup> and then twice/week, for 3 weeks.

374

375 **Indirect Coombs hemagglutination assay**

376 Whole blood from healthy human donors were collected in EDTA tubes and centrifuged to  
 377 remove plasma. Red blood cells (RBC) were resuspended in DG Gel Sol (Grifols) and treated  
 378 with ISB 1342, daratumumab or control molecules for 30 minutes at 37°C, and then centrifuged  
 379 in the DG Gel Coombs cards (Grifols). Any agglutinated RBCs are captured at the top of or  
 380 along the gel column, and non-agglutinated RBCs descend to the bottom of the microtube  
 381 forming a pellet. Extent of agglutination was scored from 0 (no agglutination) to 4 (complete  
 382 agglutination).

383

384 **Statistical analysis**

385 Statistical analysis and graphs were generated using GraphPad Prism software  
 386 (GraphPad Software Inc., La Jolla, CA, USA). A non-linear one site binding (hyperbola)

387 regression was applied to calculate  $K_D$  in CBA assays. The percentage of killing and T-cell  
388 response were fitted with 4PL non-linear regression with variable slope and the maximum fitted  
389 response and the  $EC_{50}$  calculated when possible.  $EC_{50}$  values were excluded when the  $R^2$  of  
390 the non-linear regression fitting curve was below 0.7, when the difference between the  
391 maximum and the minimum response was below 10% or when the calculated  $EC_{50}$  values were  
392 out of the range of the antibody concentration range tested. For the MMOAK experiments,  $EC_{50}$   
393 and maximum killing values were not included when spontaneous killing (killing in absence of  
394 treatments compared to target only) was above 50%.

395  
396 Normality of data was checked using the Kolmogorov–Smirnov test and non-parametric tests  
397 were used when the data did not follow normal distribution. Differences between individual  
398 treatments or groups were analysed by paired or unpaired t-test as appropriate. One or two-  
399 way analysis of variance (ANOVA) was used for multiple group comparison followed by a post  
400 hoc analysis where appropriate, using Tukey’s test for comparisons between all groups when  
401 data followed normal distribution or a Dunnett’s test for comparisons to a control group when  
402 data followed normal distribution or Kruskal-Wallis test when comparing to a control group and  
403 data did not follow normal distribution. The post test was selected to show relevant comparison  
404 between data groups that allow to answer specific scientific questions. P values  $\leq 0.05$  were  
405 considered significant.
